# Supplementary material for: Facile hydrothermal synthesis of SnCoS4/graphene composites with excellent electrochemical performance for reversible lithium ion storage
Source: Royal Society of Chemistry journal article supplement (doi:10.1039/c6ta04196e), 2016-01-01
Supplement: c6ta04196e1.pdf [file c6ta04196e1.pdf]

## Electronic Supplementary Information (ESI)

### Facile hydrothermal synthesis of SnCoS<sub>4</sub>/graphene composites with excellent electrochemical performances for reversible lithium ion storage

Jianbo Ye, Tao Chen, Qiannan Chen, Weixiang Chen,\* Zheting Yu, Shurui Xu

*Department of Chemistry, Zhejiang University, Hangzhou 310027, P.R. China.*

*Fax: +86 571 87951895; Tel: +86 571 87952477; E-mail: weixiangchen@zju.edu.cn*

TGA was carried out to quantify the composition of SnS<sub>2</sub>/GNS, CoS<sub>2</sub>/GNS and SnCoS<sub>4</sub>/GNS composites. As shown in Fig. S1(a), TGA curve of SnS<sub>2</sub>/GNS exhibits three regions of weight loss in the air atmosphere. The initial weight loss below 200 °C is due to the evaporation of adsorbed water in the composite.<sup>1,2</sup> The second weight loss between 200 °C to 425 °C is attributed to the transformation from SnS<sub>2</sub> to SnO<sub>2</sub><sup>1</sup> and oxidation of oxygen-contained functional group of reduced graphene oxide.<sup>3,4</sup> The third weight loss in the temperature ranging from 430 °C to 600 °C is assigned to the removal of graphene.<sup>1,3</sup> Thus, the remaining residue is SnO<sub>2</sub> for SnS<sub>2</sub>/GNS composite. As shown in Fig. S1(b), there are several stages of weight loss for CoS<sub>2</sub>/GNS, which is similar to that of CoS<sub>2</sub>/carbon nanotubes and CoS<sub>2</sub>/graphene nanocomposite reported elsewhere.<sup>5,6</sup> Those several weight losses for CoS<sub>2</sub>/GNS in the air atmosphere should include the evaporation of adsorbed water, oxidation of oxygen-contained functional group, reduced graphene oxide and CoS<sub>2</sub>. According to the literatures,<sup>5,6</sup> the weight loss from 600 °C to 800 °C should be ascribed to the oxidation of CoS<sub>2</sub> to Co<sub>3</sub>O<sub>4</sub>. Thus, the remaining residue should be Co<sub>3</sub>O<sub>4</sub> for CoS<sub>2</sub>/GNS composites. Fig. S1(c) shows that the TGA curve of SnCoS<sub>4</sub>/GNS composite also displays several regions of weight loss in the air atmosphere. According to the literatures,<sup>1,5,6</sup> SnS<sub>2</sub> and CoS<sub>2</sub> should be transferred to SnO<sub>2</sub> and Co<sub>3</sub>O<sub>4</sub> over 800°C, respectively. The reduced graphene oxide (or graphene) also should be completely oxidized to CO<sub>2</sub> over 800 °C.<sup>3-5</sup> Therefore, the

remaining residue was SnO<sub>2</sub> and Co<sub>3</sub>O<sub>4</sub> for SnCoS<sub>4</sub>/GNS composite.

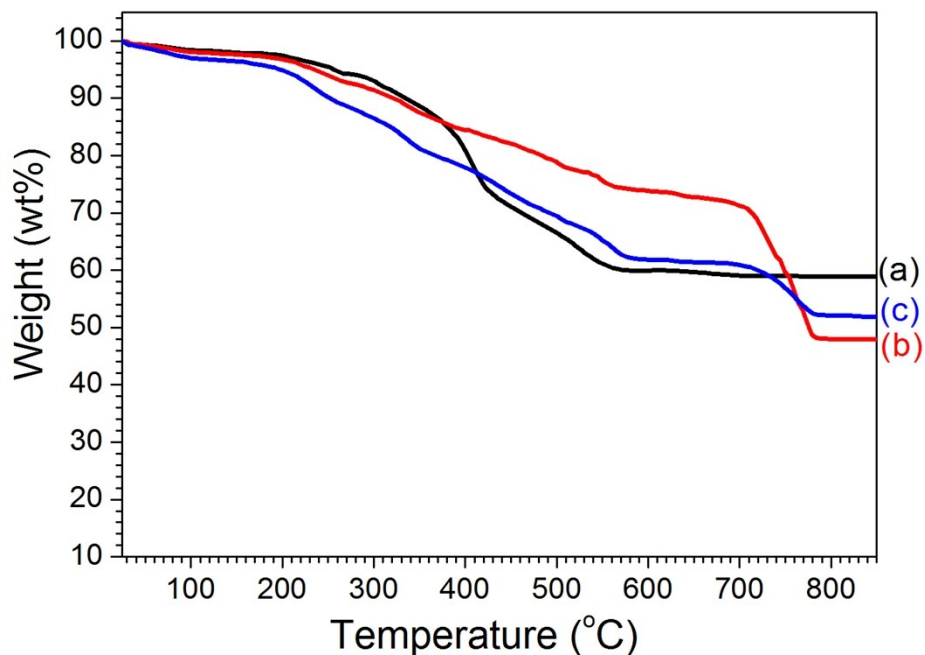

**Fig. S1.** The TGA curves of (a) SnS<sub>2</sub>/GNS, (b) CoS<sub>2</sub>/GNS and (c) SnCoS<sub>4</sub>/GNS.

Based on the above investigations, the remaining residue should be SnO<sub>2</sub> for SnS<sub>2</sub>/GNS composites, Co<sub>3</sub>O<sub>4</sub> for CoS<sub>2</sub>/GNS composites, SnO<sub>2</sub> and Co<sub>3</sub>O<sub>4</sub> for SnCoS<sub>4</sub>/GNS composite. Therefore, the SnS<sub>2</sub> and graphene content of SnS<sub>2</sub>/GNS composite can be calculated to be 74.6 wt% and 25.4 wt%, respectively. The CoS<sub>2</sub> and graphene content of CoS<sub>2</sub>/GNS composite can be calculated to be 75.8 wt% and 24.2 wt%, respectively. The SnCoS<sub>4</sub> and graphene content of SnCoS<sub>4</sub>/GNS composite can be calculated to be 72.7 wt% and 27.3 wt%, respectively.

## References:

1. N. Du, X. Wu, C. Zhai, H. Zhang and D. Yang, *J. Alloys Comp.*, 2013, **580**, 457-464.
2. J. Li, P. Wu, F. Lou, P. Zhang, Y. Tang, Y. Zhou and T. Lu, *Electrochim. Acta*, 2013, **111**, 862-868.
3. J. Ye, L. Ma, W. Chen, Y. Ma, F. Huang, C. Gao and J. Y. Lee, *J. Mater.*

*Chem. A*, 2015, **3**, 6884-6893.

4. W. Xu, Z. Xie, X. Cui, K. Zhao, L. Zhang, G. Dietrich, K. M. Dooley and Y. Wang, *ACS Appl. Mater. Interfaces*, 2015, **7**, 22533-22541.
5. Z. X. Huang, Y. Wang, J. I. Wong, W. H. Shi and H. Y. Yang, *Electrochim. Acta*, 2015, **167**, 388-395.
6. B. Wang, J. Park, D. Su, C. Wang, H. Ahn and G. Wang, *J. Mater. Chem.*, 2012, **22**, 15750-15756.
